# Supplementary material for: Polycarbonate-based core-crosslinked redox-responsive nanoparticles for targeted delivery of anticancer drug
Source: Royal Society of Chemistry journal article supplement (doi:10.1039/c8tb00346g), 2018-01-01
Supplement: c8tb00346g1.pdf [file c8tb00346g1.pdf]

Electronic Supplementary Material (ESI) for Journal of Materials Chemistry B.

### Supplementary Information

## Polycarbonate-based core-crosslinked redox-responsive nanoparticles for targeted delivery of anticancer drug

Yingchun Xia<sup>†a</sup>, Ningning Wang<sup>†b</sup>, Zhouliang Qin<sup>a</sup>, Juan Wu<sup>a</sup>, Fang Wang<sup>a</sup>, Li Zhang<sup>a</sup>, Xinnian Xia<sup>a</sup>, Jishan Li<sup>\*b</sup> and Yanbing Lu<sup>\*a</sup>

<sup>a</sup> Institute of Polymer Science, College of Chemistry and Chemical Engineering, Hunan University, Changsha 410082, China

<sup>b</sup> Institute of Chemical Biology and Nanomedicine, State Key Laboratory of Chemo/Biosensing and Chemometrics, College of Chemistry and Chemical Engineering, Hunan University, Changsha 410082, China

### Synthesis of $\alpha$ -lipoic acid, 2-azidoethyl ester (LA-N<sub>3</sub>)

LA-N<sub>3</sub> was synthesized by a two-step method, namely esterification of  $\alpha$ -lipoic acid (LA) with 2-bromoethanol and substitution reaction with sodium azide.<sup>1</sup> Typically, LA (1.500 g, 7.3 mmol) and DCC (1.648 g, 8.0 mmol) were dissolved in anhydrous DCM (20 mL). The mixture was kept stirring at 0 °C for 30 min. A solution of 2-bromoethanol (0.863 g, 6.9 mmol) and DMAP (0.089g, 0.73 mmol) in DCM (20 mL) was added dropwise. After dispersing with vigorous stirring and incubation for 1 h, the resulting mixture was then stirred at room temperature for 24 h. The insoluble salts were removed by filtration, and the filtrate was washed with saturated NaHCO<sub>3</sub> and saturated NaCl solution, dried over anhydrous MgSO<sub>4</sub>, filtered, and evaporated. The residue was purified by silica column chromatography using petroleum ether/ethyl acetate as eluent.  $\alpha$ -Lipoic acid, 2-bromoethyl ester was obtained as a yellow oil. Yield:1.530 g (70.8%).

$\alpha$ -Lipoic acid, 2-bromoethyl ester (1.500 g, 4.8 mmol) and sodium azide (0.960 g, 14.8 mmol) were dissolved in DMF (15 mL). The mixture was stirred at 80 °C overnight. Then, the resulting mixture was diluted with DCM, filtered, washed with deionized water and saturated NaHCO<sub>3</sub>, dried over MgSO<sub>4</sub> and evaporated. LA-N<sub>3</sub> was obtained as a yellow oil. Yield:1.121 g (84.8%).

### Synthesis of 6-azido-hexanoic acid ethyl ester (AHE-N<sub>3</sub>)

AHE-N<sub>3</sub> was also prepared by a similar two-step procedure as the synthesis of LA-N<sub>3</sub>. Briefly, 6-bromohexanoic acid (1.950 g, 10 mmol) and p-toluenesulfonic acid (0.172 g, 1.0 mmol) were dissolved in ethanol (30 mL). The mixture was stirred and heated to reflux. After 24 h, the unreacted ethanol was removed by rotary evaporation. The crude product was then diluted with DCM, washed with saturated NaCl and saturated Na<sub>2</sub>CO<sub>3</sub>, dried over MgSO<sub>4</sub>. When the solution was evaporated to dryness, 6-bromohexanoic acid ethyl ester was obtained. Yield: 1.975 g (89.7%).

In a 50 mL round-bottomed flask, DMF (20 mL) was poured into the mixture of 6-bromohexanoic acid ethyl ester (1.970 g, 8.8 mmol) and NaN<sub>3</sub> (0.861 g, 13.3 mmol). The reaction solution was stirred at 80 °C for 24 h. Residual NaN<sub>3</sub> was removed by filtration. The filtrate was diluted with DCM, washed with deionized water as well as saturated NaHCO<sub>3</sub>, and then dried over MgSO<sub>4</sub>. After being concentrated by rotary evaporation, the crude product was further purified by silica gel column chromatography using petroleum ether/ethyl acetate as eluent. AHE-N<sub>3</sub> was obtained as colorless oil. Yield:1.543 g (94.8%).



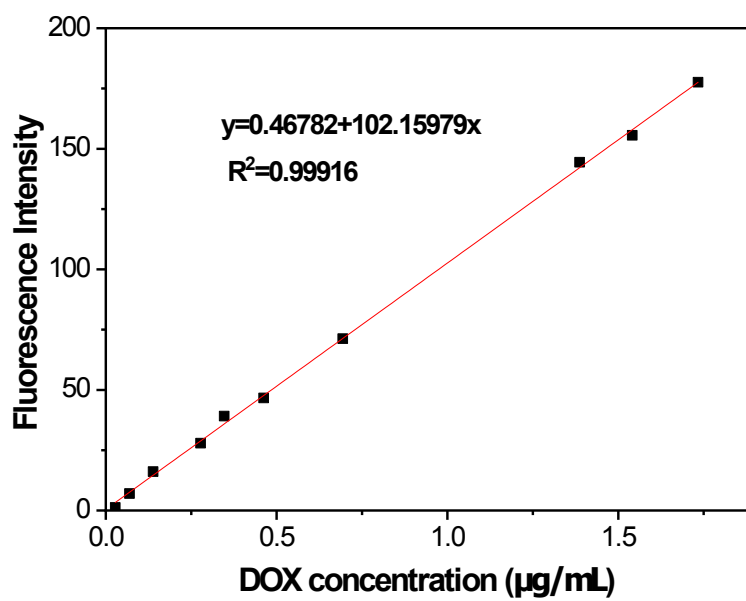

Figure S1. Standard curve of DOX in PBS.

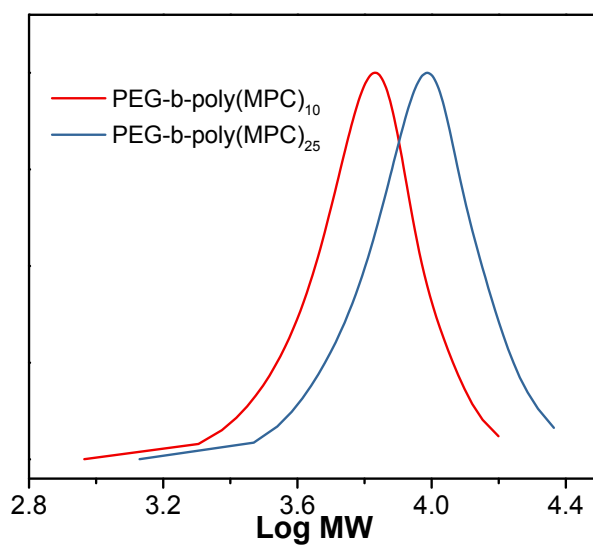

Figure S2. GPC curves of PEG-b-poly(MPC)<sub>n</sub>.

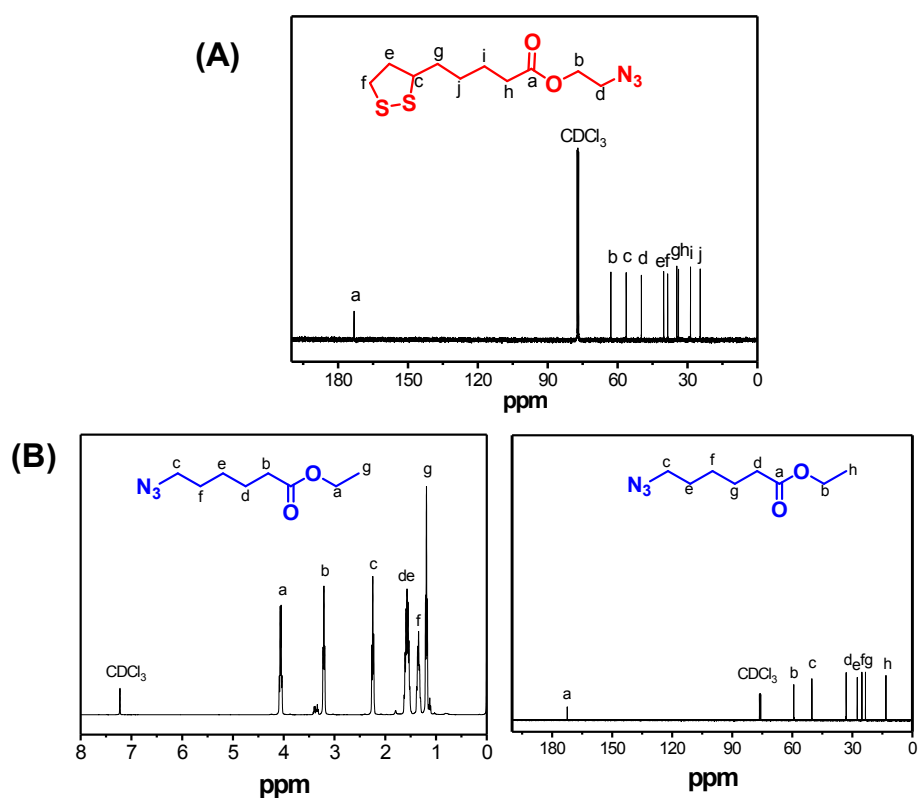

Figure S3. The NMR spectra of LA-N<sub>3</sub> (A) and AHE-N<sub>3</sub> (B).

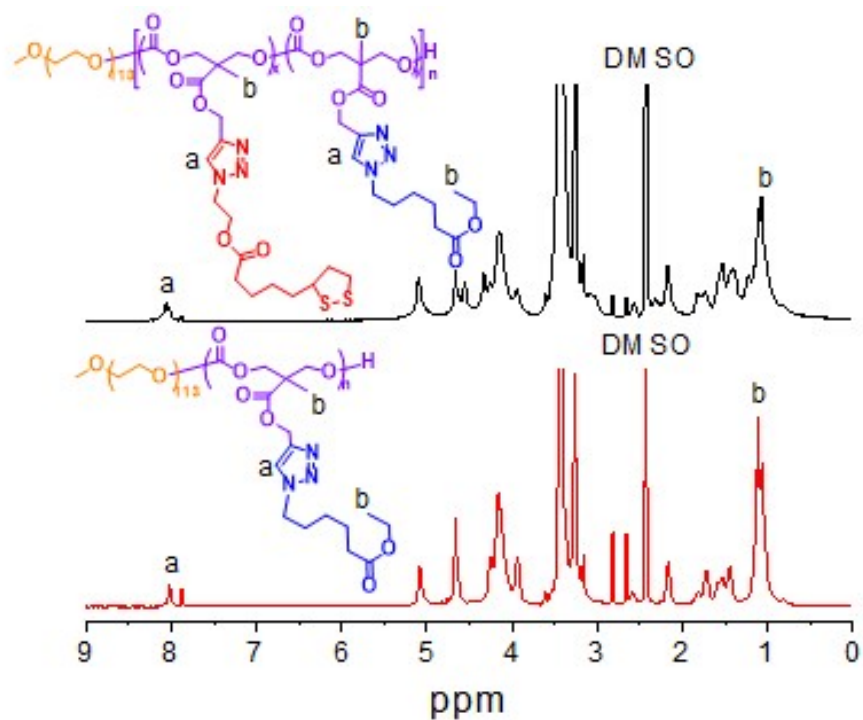

Figure S4. <sup>1</sup>H NMR spectra of PEG-b-poly(MPC-LA/AHE)<sub>25</sub> and PEG-b-poly(MPC-AHE)<sub>25</sub> obtained after click reaction.

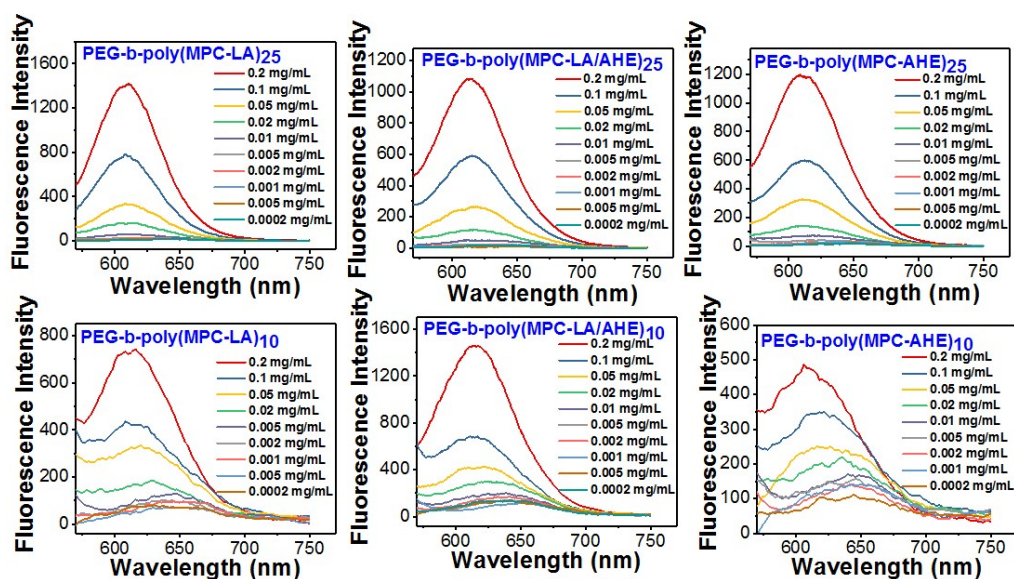

Figure S5. Fluorescence emission spectra of Nile Red in PMPC-based polymers of varying concentrations.

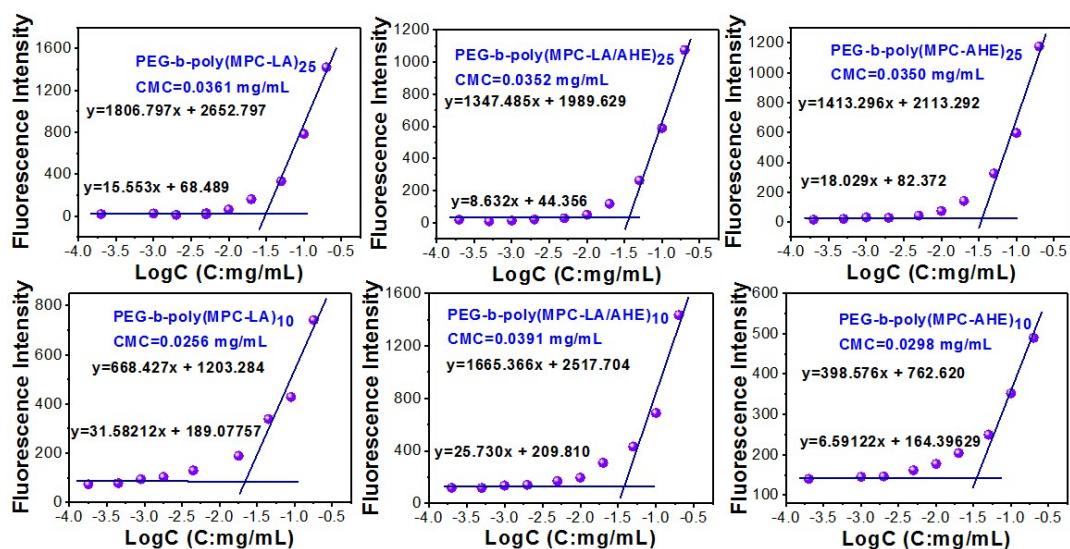

Figure S6. Determination of CMC using Nile Red as a fluorescent probe. The fluorescence intensity at the maximum emission wavelength is plotted against the log of concentration and the CMC was estimated as the cross-point when extrapolating the fluorescence intensity at the low and high concentration regime.

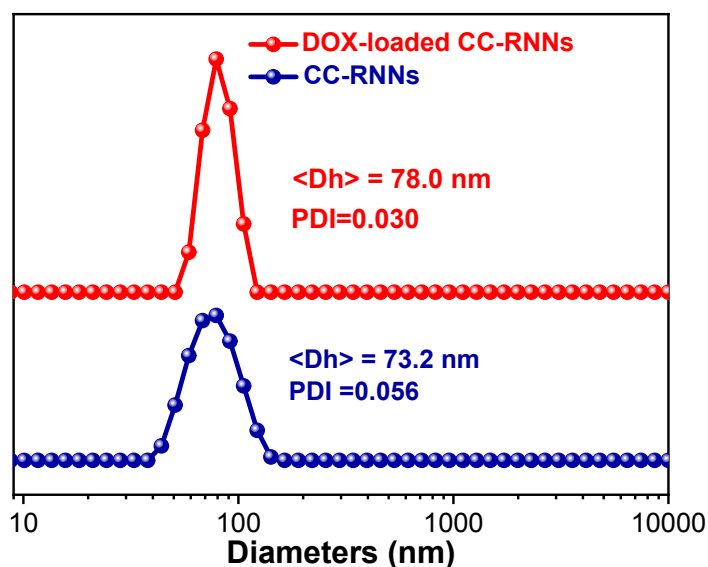

**Figure S7.** Distributions of hydrodynamic diameters of CC-RNNs-1 and DOX-loaded CC-RNNs-1.

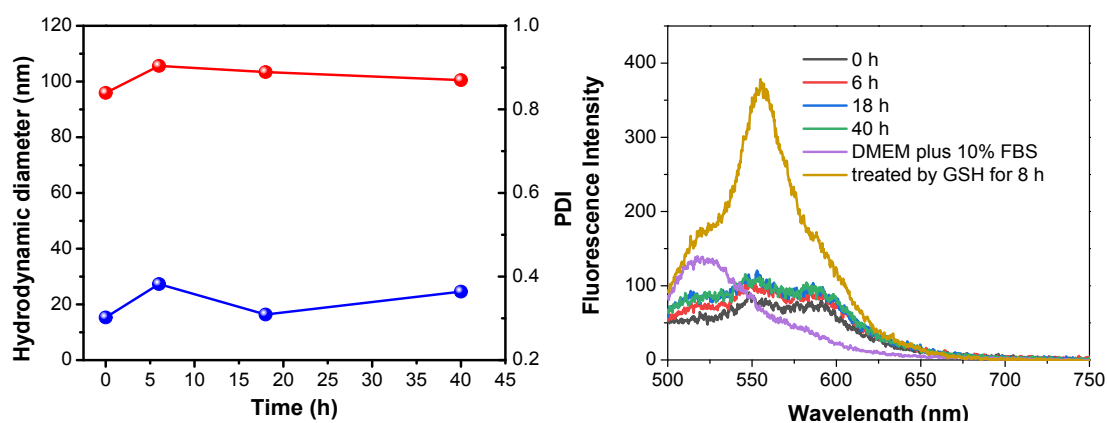

**Figure S8.** The diameters change of CC-RNNs-2 incubated in DMEM plus 10% FBS at specific time-points (left); the fluorescence spectra of DMEM plus 10% FBS, DOX-loaded CC-RNNs-2 incubated for 0, 6, 18, and 40 h at 37 °C and after 40 h incubation treated by 10 mM GSH for 8 h. ( $C = 0.2\text{ mg/mL}$ ).

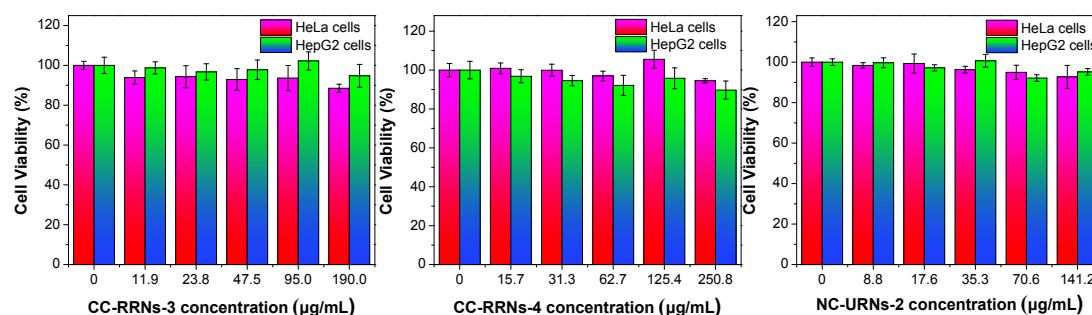

**Figure S9.** Cytotoxicity of blank CC-RNNs-3, CC-RNNs-4, and NC-URNs-2 in HeLa cells and HepG2 cells. The cells were incubated with NPs for 36 h. Data are presented as the average  $\pm$  standard deviation ( $n = 3$ ).

## References

1 A. Martí, A. M. Costero, P. Gaviña, M. Parra, *Chem. Commun.*, 2015, **51**, 3077-3079.
